# Supplementary material
Source: PubMed Central journal article supplement (PMC6445712)
Supplement: NIHMS1517494-supplement-1.pdf [file NIHMS1517494-supplement-1.pdf]

# Dynamic contrast-enhanced MRI detects responses to stroma-directed therapy in mouse models of pancreatic ductal adenocarcinoma

**Authors:** Jianbo Cao<sup>1-2</sup>, Stephen Pickup<sup>1</sup>, Cynthia Clendenin<sup>4-5</sup>, Barbara Blouw<sup>3</sup>, Hoon Choi<sup>1</sup>, David Kang<sup>3</sup>, Mark A. Rosen<sup>1,5</sup>, Peter J. O'Dwyer<sup>4-5\*</sup> and Rong Zhou<sup>1,5\*</sup>

## **Affiliations:**

<sup>1</sup>Department of Radiology, University of Pennsylvania, Philadelphia, PA 19104.

<sup>2</sup>Medical College, Xiamen University, Xiamen, Fujian, 361102, P.R. China.

<sup>3</sup>Halozyme Therapeutics, San Diego, CA 92121.

<sup>4</sup>Pancreatic Cancer Research Center, University of Pennsylvania, Philadelphia, PA 19104.

<sup>5</sup>Abramson Cancer Center, University of Pennsylvania, Philadelphia, PA 19104.

\*Corresponding author emails: [rongzhou@upenn.edu](mailto:rongzhou@upenn.edu) or Peter.O'Dwyer@uphs.upenn.edu

## **Supplementary Materials list**

Fig. S1. Pre and post treatment  $K^{trans}$  values from individual mouse subjected to weekly PEGPH20 treatment for 3 consecutive weeks.

Fig. S2. Blood and tumor longitudinal relaxation time (mean  $\pm$ SD) in the absence of CA (T<sub>10</sub>).

Fig. S3. Representative HPLC profiles of tumor extracts from PEGPH20 and VEH treated group.

## Supplemental Figure 1

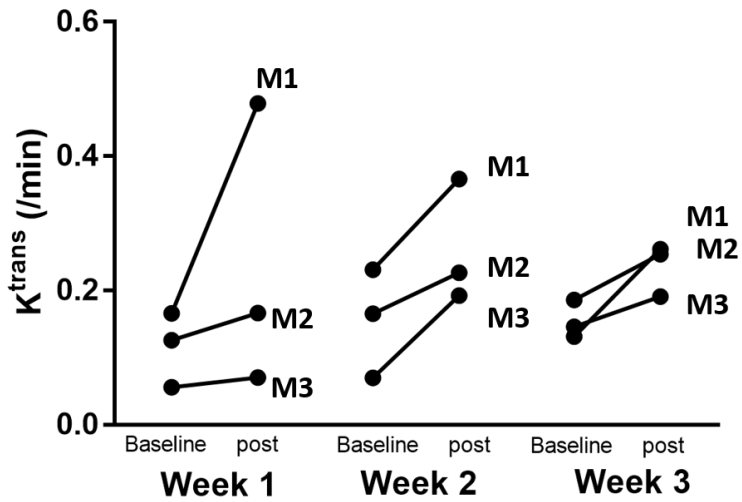

**Fig. S1. Pre and post treatment  $K^{trans}$  values from mice subjected to weekly PEGPH20 treatment.** Mice bearing BxPC-3 subcutaneous tumor were treated by weekly injection of PEGPH20 for 3 consecutive weeks, DCE MRI was conducted each week at before and 24 hours post treatment. The paired  $K^{trans}$  value shows a consistent increase after each injection (average increase of 82%, 92% and 35% after the 1<sup>st</sup>, 2<sup>nd</sup> and 3<sup>rd</sup> injection, respectively) and partial recovery before the next treatment. (M1, M2 and M3 indicate mouse number 1, 2 and 3).

## Supplemental Figure 2

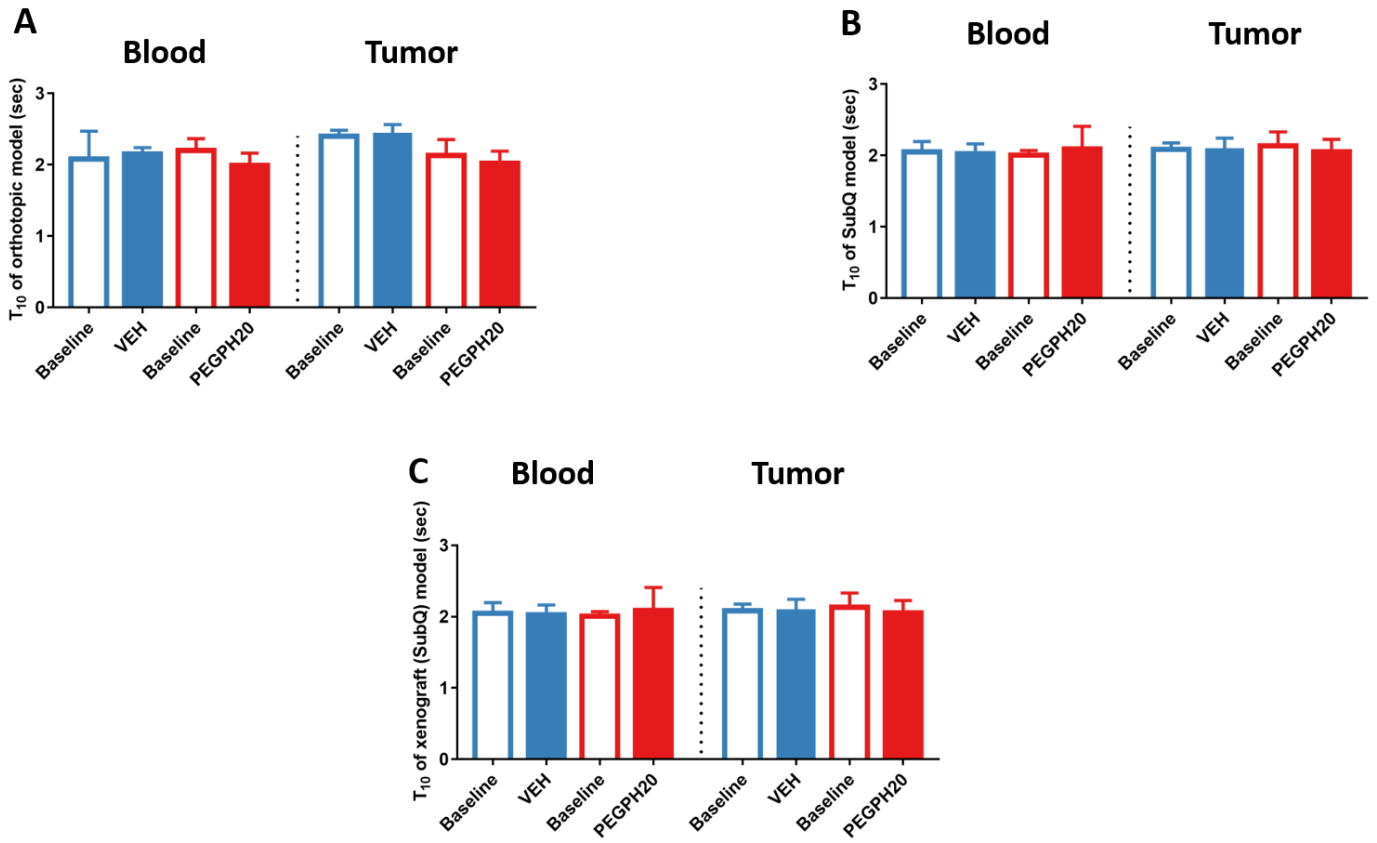

Fig. S2. Blood and tumor longitudinal relaxation time (mean  $\pm$ SD) in the absence of CA ( $T_{10}$ ).

### Supplemental Figure 3

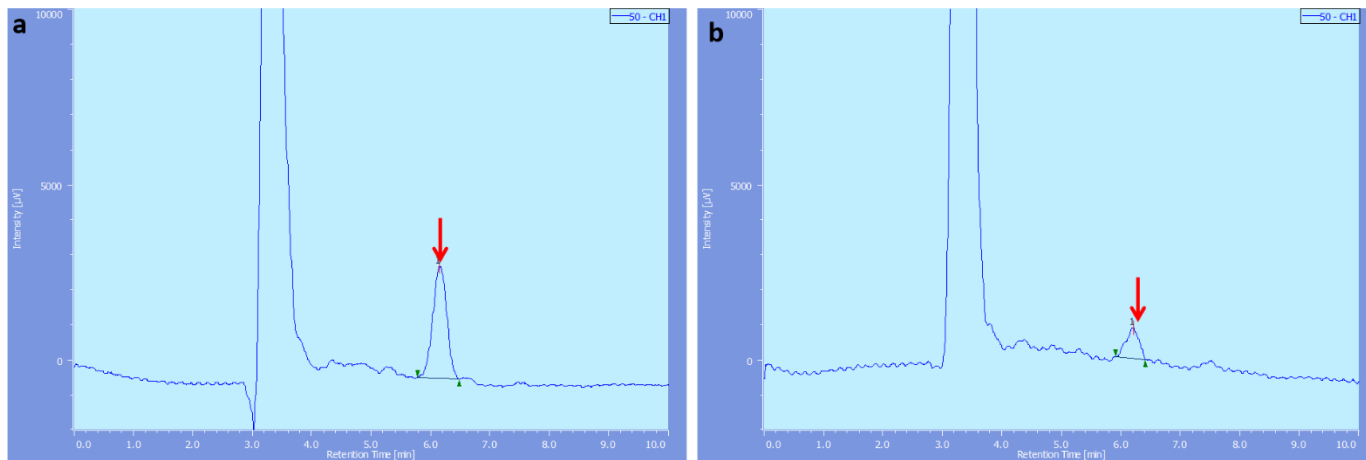

**Fig. S3. Representative HPLC profiles of tumor extracts from PEGPH20 (a) and VEH (b) treated group.**
